# Supplementary material for: p53 and p63 Proteoforms Derived from Alternative Splicing Possess Differential Seroreactivity in Colorectal Cancer with Distinct Diagnostic Ability from the Canonical Proteins
Source: MDPI journal article supplement (doi:10.3390/cancers15072102), 2023-03-31
Supplement: s1 [file s1]

## pDONR221 vectors

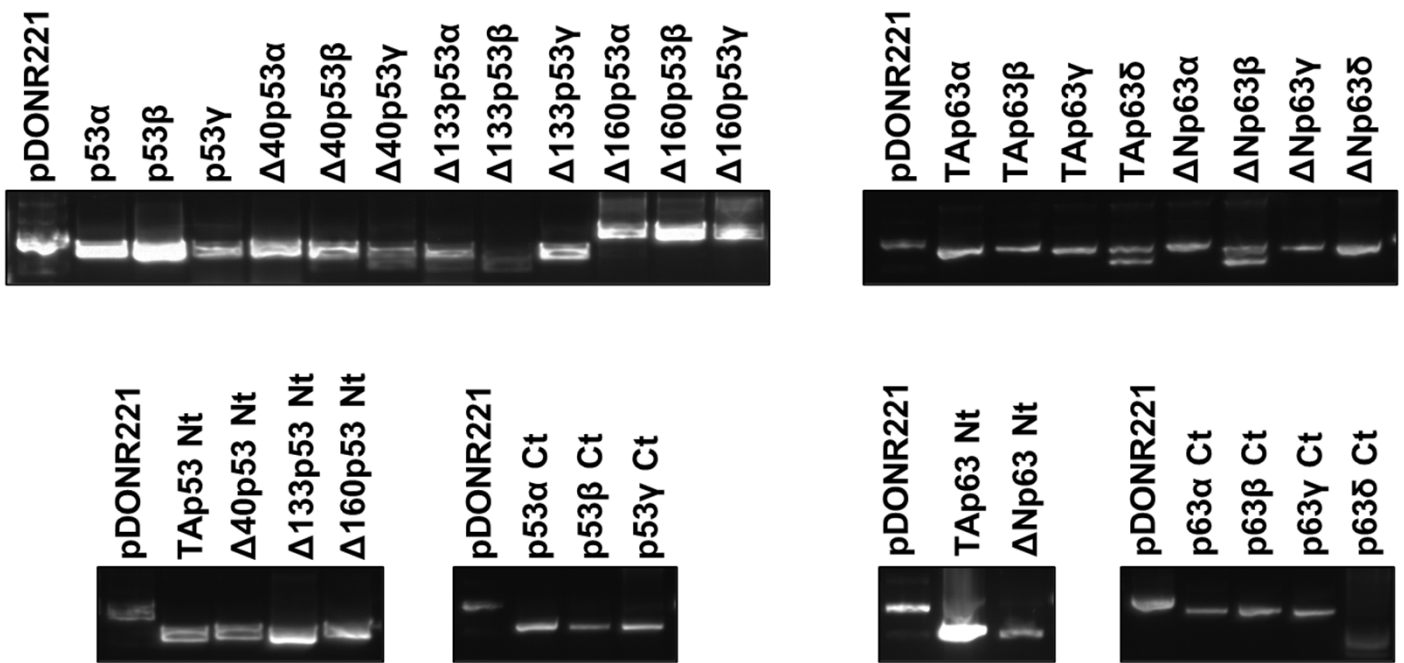

## pANT7\_cHalo/pJFT7\_nHalo vectors

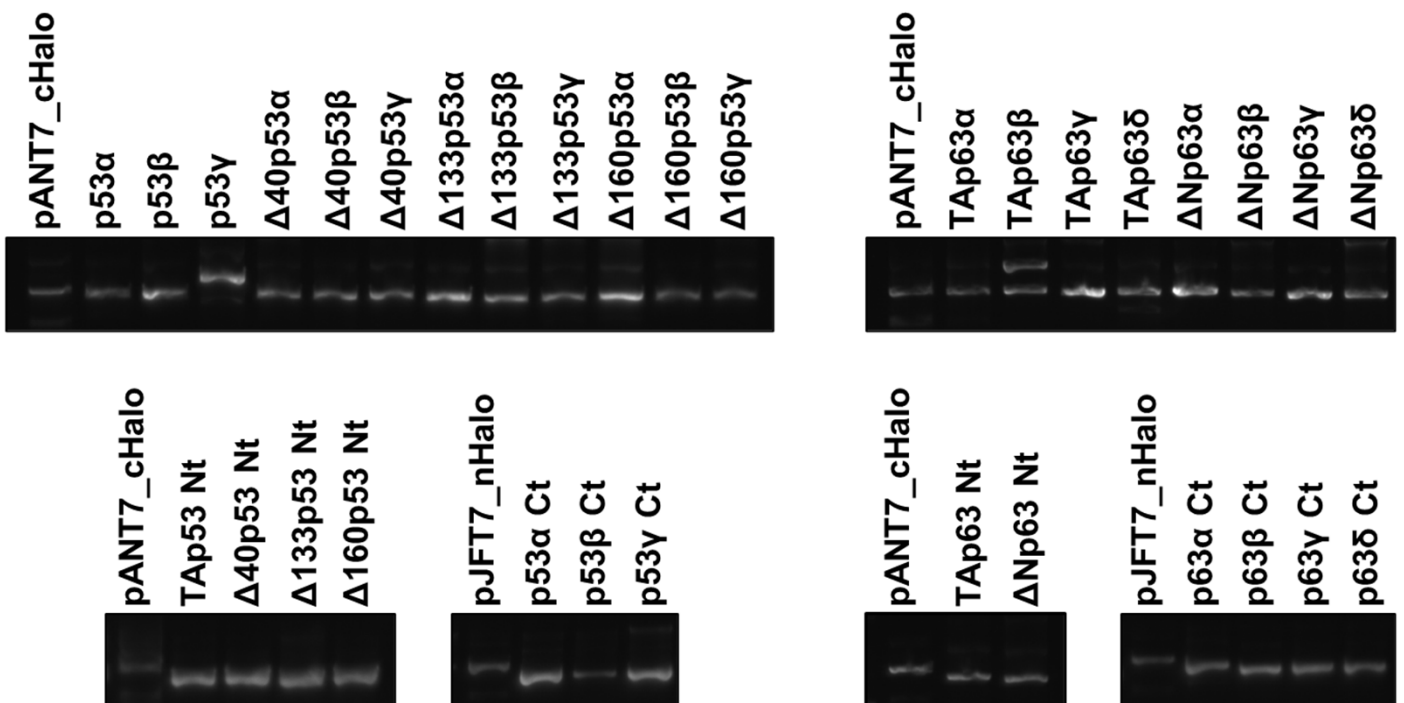

**Supplementary Figure S1.** Confirmation of the correct cloning of the p53 and p63 full length proteoforms and specific N-terminal and C-terminal end peptides into the pDONR221 donor vector and the pANT7\_cHalo or pJFT7\_nHalo expression vectors was assessed by agarose gel electrophoresis of plasmids isolated from *E. coli* cells after transformation.
