# Supplementary figures and images for: p53 and p63 Proteoforms Derived from Alternative Splicing Possess Differential Seroreactivity in Colorectal Cancer with Distinct Diagnostic Ability from the Canonical Proteins
Source: MDPI journal article supplement (doi:10.3390/cancers15072102), 2023-03-31

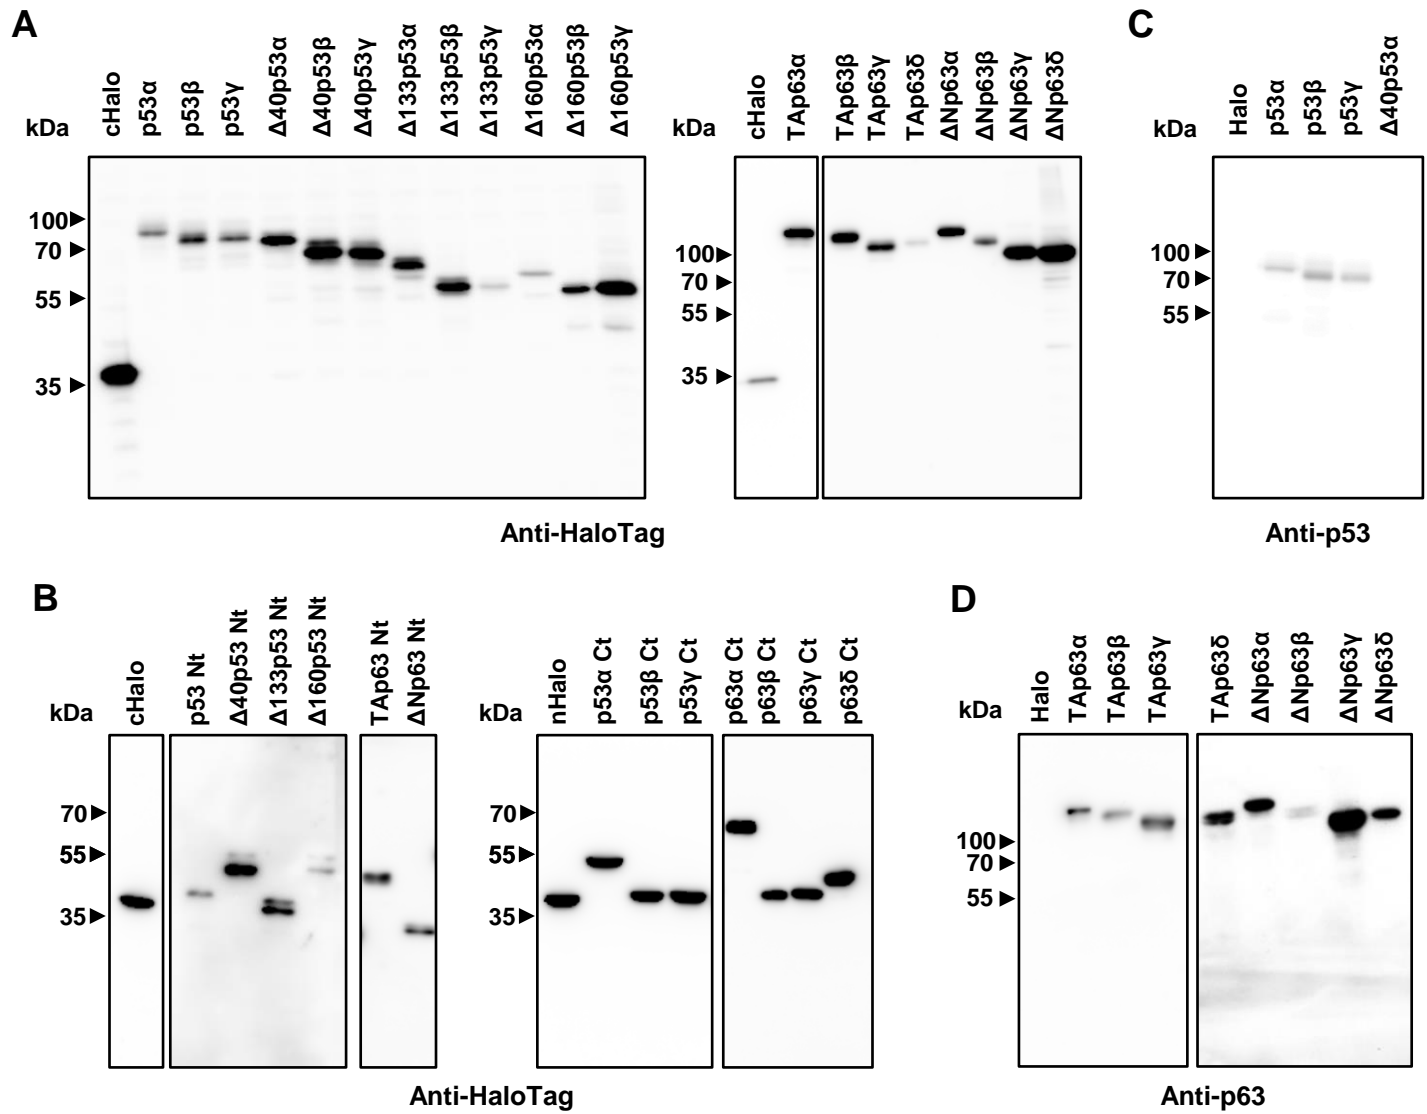

**Supplementary Figure S2.** The original western blot figures of Figure 3.

Supplement: s1 [file s1]
